# Supplementary material for: Variations of air pollutant response to COVID-19 lockdown in cities of the Tibetan Plateau
Source: Royal Society of Chemistry journal article supplement (doi:10.1039/d2ea00168c), 2023-01-01
Supplement: d2ea00168c1.pdf [file d2ea00168c1.pdf]

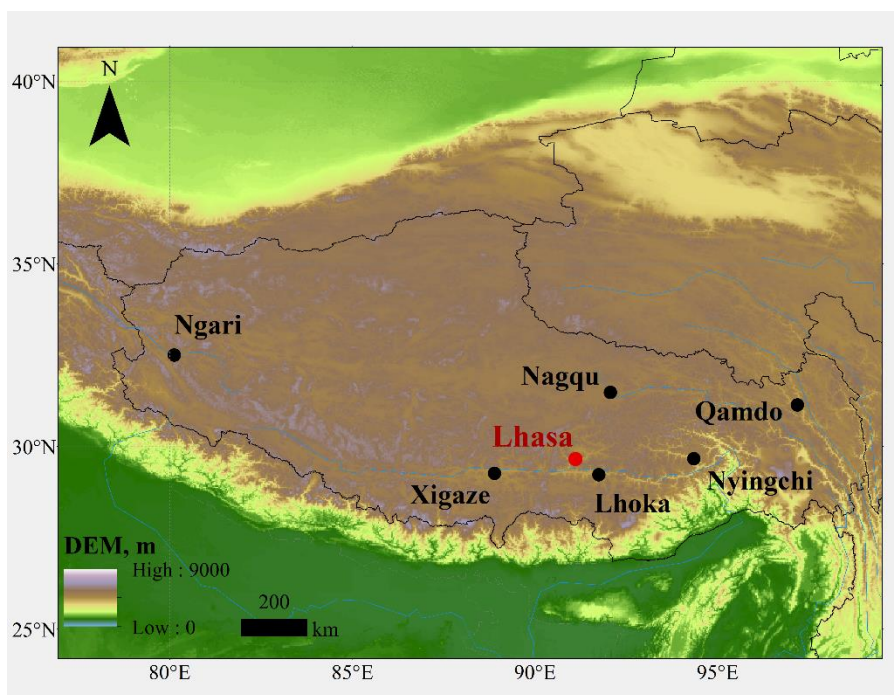

Figure S1. Location of seven major cities in Tibet

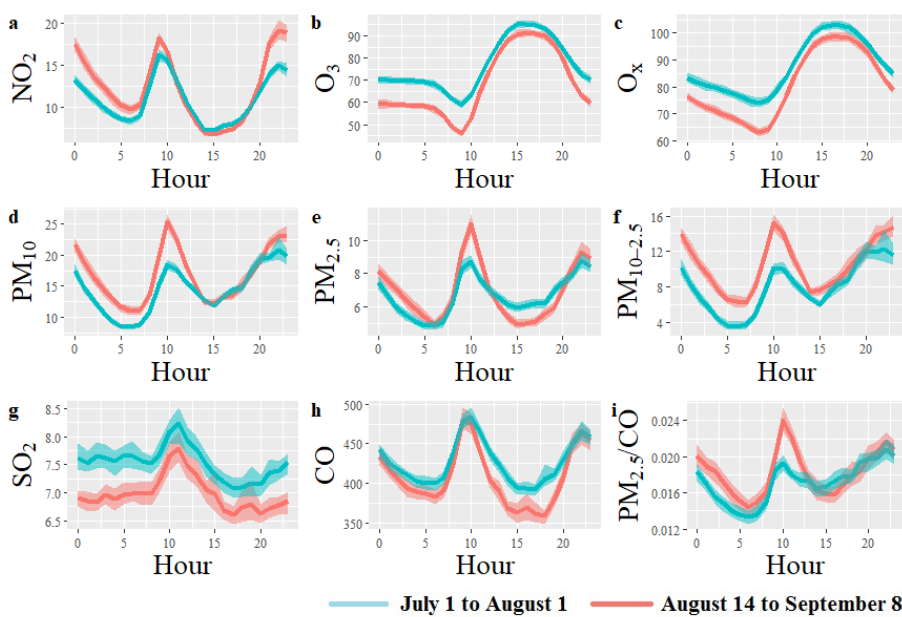

Figure S2. Diurnal variations in air pollutants during the same periods in 2019-2021 with 2022. Units are the same as in Fig. 2.

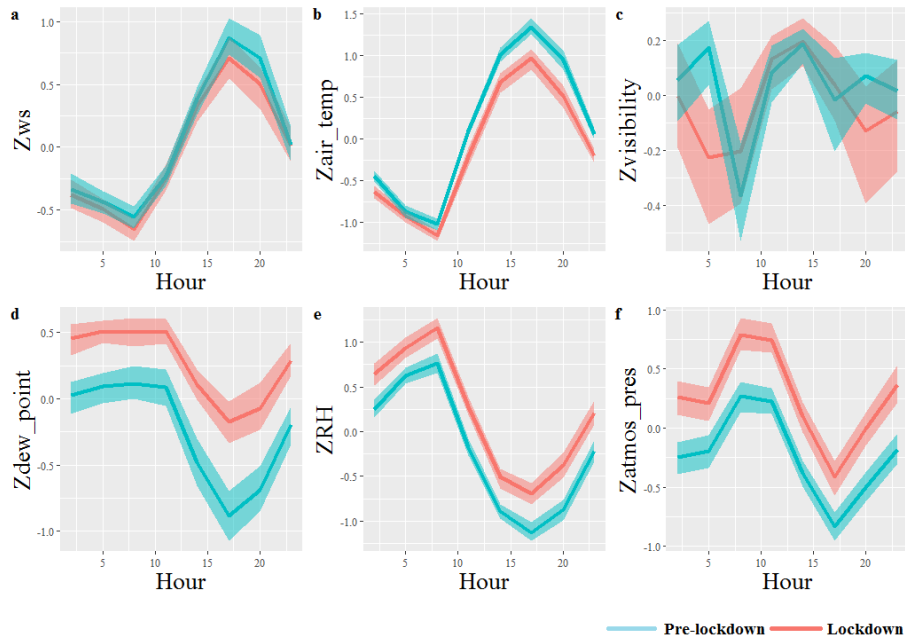

**Figure S3.** Diurnal variations in meteorological condition during the pre-lockdown and lockdown in 2022. The zero-mean method (Z) normalized the differences among the ISD observation sites: (a) wind speed (Zws), (b) air temperature (Zair\_temp), (c) visibility (Zvisibility), (d) dew point (Zdew\_point), (e) relative humidity (ZRH), (f) sea level pressure atmospheric pressure (Zatmos\_pres).

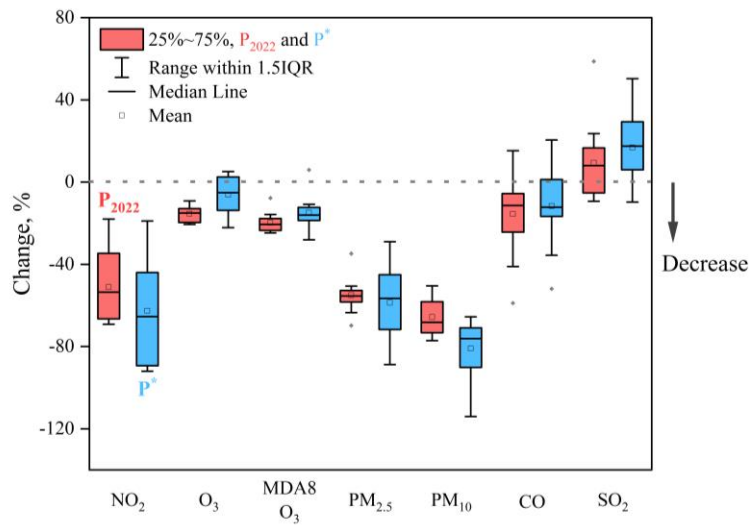

**Figure S4.** Percent change rate of air pollutants. Boxplots of the statistical results of observation sites in hourly time resolution except 8-hour daily maximum O<sub>3</sub> (MDA8 O<sub>3</sub>, daily resolution)

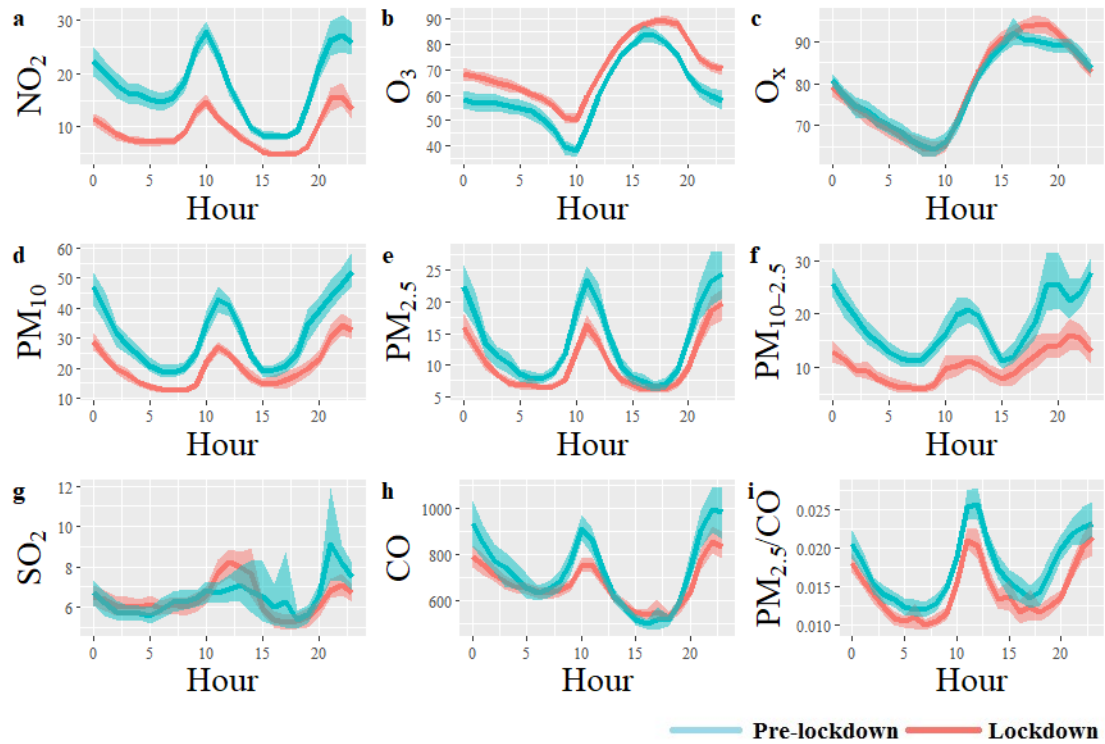

**Figure S5.** Diurnal variations in air pollutants during the pre-lockdown and lockdown in 2020. Units:  $\mu\text{g}/\text{m}^3$  for  $\text{NO}_2$  (a),  $\text{O}_3$  (b), total gaseous oxidant ( $\text{O}_x = \text{NO}_2 + \text{O}_3$ ) (c),  $\text{PM}_{10}$  (d),  $\text{PM}_{2.5}$  (e), Coarse particles ( $\text{PM}_{10-2.5} = \text{PM}_{10} - \text{PM}_{2.5}$ ) (f),  $\text{SO}_2$  (g); CO (h); Dimensionless for the rate of  $\text{PM}_{2.5}/\text{CO}$  (i). Error bars represent the 95% confidence interval of the hourly mean via “openair” R-package.

**Table S1.** Correlation coefficients between predicted values and observation values

| Date                      | City     | PM <sub>2.5</sub> | PM <sub>10</sub> | CO   | SO <sub>2</sub> | O <sub>x</sub> | O <sub>3</sub> | NO <sub>2</sub> | PM <sub>10-2.5</sub> | PM <sub>2.5</sub> /CO |
|---------------------------|----------|-------------------|------------------|------|-----------------|----------------|----------------|-----------------|----------------------|-----------------------|
| 2022/07/01-<br>2022/09/30 | Ngari    | 0.91              | 0.59             | 0.95 | 0.96            | 0.96           | 0.96           | 0.89            | 0.89                 | 0.89                  |
|                           | Qamdo    | 0.72              | 0.86             | 0.94 | 0.93            | 0.96           | 0.96           | 0.92            | 0.90                 | 0.89                  |
|                           | Lhasa    | 0.92              | 0.93             | 0.91 | 0.90            | 0.97           | 0.96           | 0.94            | 0.90                 | 0.90                  |
|                           | Nyingchi | 0.90              | 0.88             | 0.99 | 0.96            | 0.96           | 0.95           | 0.90            | 0.87                 | 0.88                  |
|                           | Xigaze   | 0.81              | 0.84             | 0.94 | 0.94            | 0.95           | 0.94           | 0.90            | 0.90                 | 0.85                  |
| Nagqu                     | 0.93     | 0.91              | 0.94             | 0.93 | 0.95            | 0.95           | 0.93           | 0.91            | 0.94                 |                       |
| 2020/01/01-<br>2020/02/29 | Ngari    | 0.87              | 0.70             | 0.87 | 0.85            | 0.95           | 0.95           | 0.92            | 0.62                 | 0.92                  |
|                           | Qamdo    | 0.88              | 0.91             | 0.93 | 0.89            | 0.96           | 0.94           | 0.93            | 0.89                 | 0.87                  |
|                           | Lhasa    | 0.94              | 0.92             | 0.95 | 0.94            | 0.95           | 0.95           | 0.92            | 0.87                 | 0.90                  |
|                           | Nyingchi | 0.92              | 0.88             | 0.96 | 0.96            | 0.97           | 0.96           | 0.93            | 0.92                 | 0.90                  |
|                           | Xigaze   | 0.94              | 0.91             | 0.94 | 0.88            | 0.93           | 0.95           | 0.93            | 0.90                 | 0.92                  |
|                           | Nagqu    | 0.91              | 0.91             | 0.91 | 0.91            | 0.91           | 0.93           | 0.93            | 0.91                 | 0.93                  |
